# Supplementary material for: A three dimensional porous metal–organic framework [Fe4L6·(DMF)3·(H2O)10] constructed from neutral discrete Fe4L6pyramids [H2L = 1,3-benzodihydroxamix acid]
Source: Royal Society of Chemistry journal article supplement (doi:10.1039/b306264c), 2004-01-01
Supplement: b306264c.pdf [file b306264c.pdf]

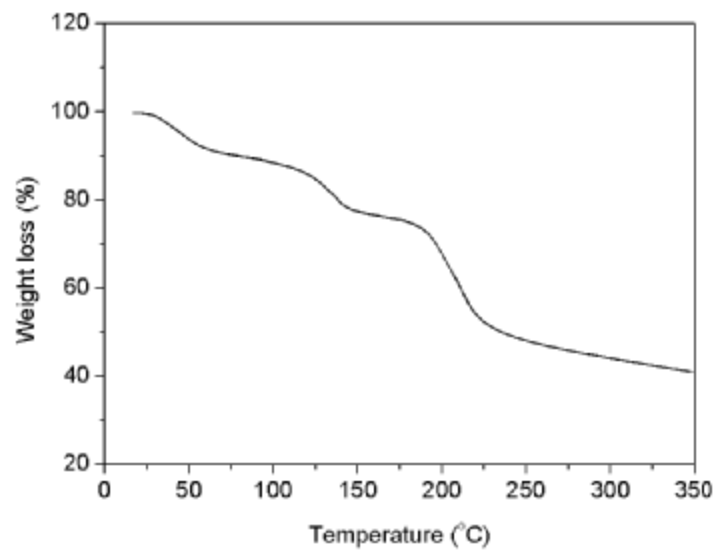

S1 TGA of the title compound **1**

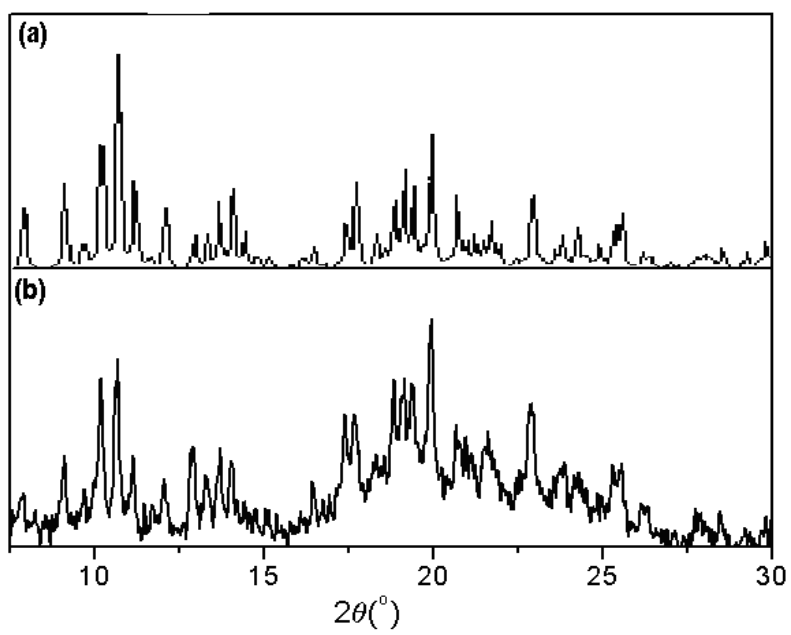

S2. The pattern calculated from the single-crystal data for complex **1** (a) and the powder X-ray diffraction pattern of the guest-lost samples **2**(b).
